# Supplementary material for: Cyp24a1 Attenuation Limits Progression of BrafV600E -Induced Papillary Thyroid Cancer Cells and Sensitizes Them to BRAFV600E Inhibitor PLX4720
Source: Oxford University Press journal article supplement (doi:10.1158/0008-5472.can-16-2066), 2017-02-27
Supplement: 00085472can162066-sup-169730_2_supp_3838124_klbp8k.docx [file 00085472can162066-sup-169730_2_supp_3838124_klbp8k.docx]

Supplementary Table 3. Top 100 differentially expressed genes in BVECyp24a1-null cells

| Gene name | Log2 Ratio  (BVECyp24a1-null / BVECyp24a1-wt) | Gene description | Functional role in cancer | Reference |
| --- | --- | --- | --- | --- |
| Efemp1 | -9.655083445 | EGF Containing Fibulin-Like Extracellular Matrix Protein 1 | Promotes tumor migration and invasion | ([1](#_ENREF_1), [2](#_ENREF_2)) |
| Hist2h2aa2 | -9.113742166 | Histone Cluster 2, H2aa4, | nucleosome assembly and DNA packaging |  |
| Ppp1r2-ps3 | -7.948367232 | protein phosphatase 1, regulatory (inhibitor) subunit 2, pseudogene 3 | unknown |  |
| Ripply1 | 10.01448548 | Ripply Transcriptional Repressor 1 | Plays a role in somitogenesis | ([3](#_ENREF_3)) |
| Hp | 9.098032083 | Haptoglobin | A tumor biomarker | ([4](#_ENREF_4)) |
| Cxcl15 | 8.918863237 | Chemokine (C-X-C motif) ligand 15 | A tumor-associated cytokine involved in the recruitment of myeloid-derived suppressor cells to the tumor site.  May promote invasion of carcinoma cells by increasing fibroblast migration | ([5](#_ENREF_5), [6](#_ENREF_6)) |
| Tff1 | 8.87958325 | Trefoil Factor 1 | Inhibits tumorigenesis by modulating Wnt/β-catenin signaling | ([7](#_ENREF_7)) |
| Olfm4 | 8.804131021 | Olfactomedin 4 | A tumor suppressor gene (negative regulator of the Wnt/β-catenin and NF-κB pathways) | ([8](#_ENREF_8)) |
| Lypd2 | 8.761551232 | LY6/PLAUR Domain Containing 2 | unknown |  |
| Slc25a43 | 8.625708843 | Solute Carrier Family 25 Member 43 | A regulator of cell cycle progression and proliferation, which is frequently deleted in HER2-positive breast tumors. | ([9](#_ENREF_9), [10](#_ENREF_10)) |
| C130026I21Rik | 8.491853096 | RIKEN cDNA C130026I21 gene, Ortholog of SP140 | unknown |  |
| Sftpa1 | 8.22881869 | Surfactant Protein A1 | unknown |  |
| Msx1 | 8.224001674 | Msh Homeobox 1 | Inhibits cell proliferation by up-regulation of Delta-Notch pathway genes | ([11](#_ENREF_11)) |
| Gpx2-ps1 | 8.194756854 | glutathione peroxidase 2, pseudogene 1 | unknown |  |
| Sftpb | 8.164906927 | Surfactant Protein B | unknown |  |
| Msx1os | 8.011227255 | msh homeobox 1 opposite strand | unknown |  |
| Clu | 7.790333062 | Clusterin | Enhances cancer cell survival via autophagy-dependent pathways | ([12](#_ENREF_12)) |
| Prl2c2 | 7.734872821 | prolactin family 2, subfamily c, member 2 | unknown |  |
| Cd300lb | 7.693486957 | CD300 molecule like family member B | Involved in the activation of innate immune cells | ([13](#_ENREF_13)) |
| Dhh | 7.482202926 | Desert Hedgehog | Regulates development during embryogenesis. It is also involved in tumor progression, autophagy and EMT phenotype | ([14](#_ENREF_14)) |
| Cdx2 | 7.409390936 | Caudal Type Homeobox 2 | A tumor suppressor. Its down-regulation is associated with poor prognosis | ([15](#_ENREF_15)) |
| Prl2c3 | 7.25593371 | prolactin family 2, subfamily c, member 3 | unknown |  |
| Ceacam16 | 7.246570959 | Carcinoembryonic Antigen Related Cell Adhesion Molecule 16 | unknown |  |
| H2-Q9 | 7.129283017 | histocompatibility 2, Q region locus 9 | A MHC class Ib molecule that mediates protective immunity against tumor cells | ([16](#_ENREF_16)) |
| Sema7a | 7.076815597 | Semaphorin 7A (John Milton Hagen Blood Group) | Promotes metastasis via IL13RA2 signaling | ([17](#_ENREF_17)) |
| Cela1 | 7 | Chymotrypsin Like Elastase Family Member 1 | unknown |  |
| Kcnq4 | 6.87036472 | Potassium Voltage-Gated Channel Subfamily Q Member 4 | unknown |  |
| Bend5 | 6.781359714 | BEN domain containing 5 | unknown |  |
| Ffar4 | 6.672425342 | Free Fatty Acid Receptor 4 | A receptor for free fatty acids and may inhibit cancer cell mobility | ([18](#_ENREF_18)) |
| Muc5ac | 6.64385619 | Mucin 5AC, Oligomeric Mucus/Gel-Forming | Inhibits tumor progression | ([19](#_ENREF_19)) |
| Pycard | 6.62935662 | PYD And CARD Domain Containing | A tumor suppressor gene. Functions as key mediator in apoptosis and inflammation | ([20](#_ENREF_20)) |
| Csprs | 6.569855608 | component of Sp100-rs | unknown |  |
| Gm6644 | -13.16757495 | predicted gene 6644, Akr1b3 pseudogene | unknown |  |
| Ndn | -13.1067265 | Necdin, MAGE Family Member | A tumor suppressor gene | ([21](#_ENREF_21)) |
| Ripk3 | -12.33399388 | Receptor Interacting Serine/Threonine Kinase 3 | An essential kinase for necroptosis, plays a key role in inhibiting acute myeloid leukemia development. Genetic loss of Ripk3 converted murine myeloproliferation into an overt AMLin Il1r1(-/-), Pycard(-/-), and Tnfr1/2(-/-) mice. | ([22](#_ENREF_22)) |
| 1700012B09Rik | -11.17242751 | RIKEN cDNA 1700012B09 gene | unknown |  |
| Crip1 | -10.12412131 | Cysteine Rich Protein 1 | Its expression is correlated with a favorable outcome and less metastases in osteosarcoma patients | ([23](#_ENREF_23)) |
| Acp5 | -9.749869427 | Tartrate-resistant acid phosphatase 5 | Pro-invasion and metastasis driver gene | ([24](#_ENREF_24), [25](#_ENREF_25)) |
| Ctsz | -9.614300859 | Cathepsin Z | Promotes tumor metastasis by inducing epithelial-mesenchymal transition | ([26](#_ENREF_26)) |
| En1 | -9.453270634 | Engrailed  homeobox 1 | Promotes tumor cell survival and resistance to chemotherapeutic agents | ([27](#_ENREF_27)) |
| Eva1b | -9.385862401 | Eva-1 Homolog B | unknown |  |
| Ppp1r14a | -9.187352073 | Protein Phosphatase 1 Regulatory Inhibitor Subunit 14A | Promote tumor transformation | ([28](#_ENREF_28)) |
| Hoxc5 | -9.131856961 | Homeobox C5 | Promote tumor transformation | ([29](#_ENREF_29)) |
| BC026585 | -9.084808388 | Quinone oxidoreductase-like protein 2 | unknown |  |
| Mall | -9.055282436 | Mal-like protein | unknown |  |
| Krt20 | -8.998355367 | Keratin 20 | Prognostic marker: high expression is associated with poor prognosis | ([30](#_ENREF_30), [31](#_ENREF_31)) |
| Tbx3os2 | -8.965784285 | T-box 3, opposite strand 2 | unknown |  |
| Cd80 | -8.857980995 | CD80 Antigen | Immune surveillance: a membrane protein found on activated B cells and monocytes that provides a costimulatory signal necessary for T cell activation and survival. It is activated by binding of CD28 (T-cell proliferation and cytokine production) or CTLA-4 (inhibits T-cell activation) | ([32](#_ENREF_32)) |
| Dlx2 | -8.816983623 | Distal-Less Homeobox 2 | Shift TGFβ from its tumor suppressive to tumor-promoting functions | ([33](#_ENREF_33)) |
| Dkkl1 | -8.77807713 | Dickkopf Like Acrosomal Protein 1 | Antagonize Wnt/beta-catenin signaling by inhibiting the Wnt coreceptors Lrp5 and 6 | ([34](#_ENREF_34)) |
| Il17b | -8.741466986 | Interleukin 17B | Tumor-promoting cytokine | ([35](#_ENREF_35)) |
| Epb41l3 | -8.62935662 | Erythrocyte Membrane Protein Band 4.1 Like 3 | Tumor suppressor gene | ([36](#_ENREF_36)) |
| Hist1h2ai | -8.503825738 | Histone Cluster 1, H2ai | nucleosome assembly and DNA packaging |  |
| Hist1h2ag | -8.463524373 | Histone Cluster 1, H2ag | nucleosome assembly and DNA packaging |  |
| 1700003F12Rik | -8.459431619 | Bcl-2-like protein | unknown |  |
| Unc93b1 | -8.271463028 | Unc-93 Homolog B1 (C. Elegans) | toll-like receptor signaling | ([37](#_ENREF_37)) |
| BC021614 | -8.243173983 | glutathione S-transferase pi 3 | promote tumor metabolism by activating glyceraldehyde-3-phosphate dehydrogenase activity | ([38](#_ENREF_38)) |
| Pcdhgb6 | -8.17990909 | Protocadherin Gamma Subfamily B, 6 | Hypermethylated in cancer | ([39](#_ENREF_39)) |
| Col13a1 | -8.108524457 | Collagen Type XIII Alpha 1 | unknown |  |
| Sept4 | -8.055282436 | Septin 4 | A conserved GTP binding protein family which is involved in multiple cellular processes | ([40](#_ENREF_40)) |
| Ldoc1l | -8.044394119 | Leucine Zipper, Down-Regulated In Cancer 1-Like | unknown |  |
| Fut4 | -8.005624549 | Fucosyltransferase 4 | Promotes EMT and invasion via EGFR activation | ([41](#_ENREF_41)) |
| Foxl2 | -7.888743249 | Forkhead Box L2 | A forkhead transcription factor, which play a role in ovarian development and function |  |
| 1810062G17Rik | -7.888743249 | RIKEN cDNA 1810062G17 gene | unknown |  |
| Lox | -7.727920455 | Lysyl Oxidase | Regulates cancer progression | ([42](#_ENREF_42)) |
| Serpina3n | -7.665335917 | serine (or cysteine) peptidase inhibitor, clade A, member 3n | Ortholog of human SERPINA3, which promotes tumor growth and metastasis | ([43](#_ENREF_43), [44](#_ENREF_44)) |
| Gpsm3 | -7.651051691 | G-Protein Signaling Modulator 3 | Regulates G-protein coupled receptor signaling | ([45](#_ENREF_45)) |
| Misp | -7.566054038 | Mitotic Spindle Positioning | Plays a key role in both spindle structure and positioning | ([46](#_ENREF_46)) |
| Csn3 | -7.46760555 | Casein Kappa | Promotes tumor growth | ([47](#_ENREF_47)) |
| Olfr1372-ps1 | -7.409390936 | olfactory receptor 1372, pseudogene 1 | unknown |  |
| P2rx7 | -7.375039431 | Purinergic Receptor P2X 7 | A plasma membrane receptor for extracellular ATP, which promotes tumor growth | ([48](#_ENREF_48)) |
| Npr2 | -7.333900737 | Natriuretic Peptide Receptor 2 | A negative regulator of TORC1 | ([49](#_ENREF_49)) |
| Xkrx | -7.312882955 | XK Related, X-Linked | unknown |  |
| Prss57 | -7.285402219 | Protease, Serine 57 | unknown |  |
| Creb3l4 | -7.247927513 | CAMP Responsive Element Binding Protein 3-Like 4 | A negative regulator of adipogenesis | ([50](#_ENREF_50)) |
| Vsir | -7.238404739 | V-type immunoglobulin domain-containing suppressor of T-cell activation | A negatively regulator of T cell response | ([51](#_ENREF_51)) |
| Tceal3 | -7.209453366 | Transcription Elongation Factor A Like 3 | unknown |  |
| Pm20d1 | -7.17990909 | Peptidase M20 Domain Containing 1 | Regulates energy homeostasis | ([52](#_ENREF_52)) |
| Prrx1 | -7.169925001 | Paired Related Homeobox 1 | Promotes EMT | ([53](#_ENREF_53)) |
| Pdzrn4 | -7.06608919 | PDZ Domain Containing Ring Finger 4 | A member of the LNX (Ligand of Numb Protein-X) family of RING-type ubiquitin E3 ligases, which mediates ubiquitination and subsequent proteasomal degradation of NUMB, a inhibitor of Notch signaling | ([54](#_ENREF_54)) |
| Fscn1 | -7.052209165 | Fascin Actin-Bundling Protein 1 | Promotes EMT and cancer metastasis by increasing cell motility | ([55](#_ENREF_55)) |
| Moxd1 | -7.011227255 | Monooxygenase DBH Like 1 | unknown |  |
| Cdh6 | -7.011227255 | Cadherin 6 | Promote EMT and cancer metastasis by restraining autophagy | ([56](#_ENREF_56)) |
| Sap25 | -6.988684687 | Sin3A Associated Protein 25kDa | Involved in the transcriptional repression mediated by the mSIN3A | ([57](#_ENREF_57)) |
| Pcdhgb7 | -6.930737338 | Protocadherin Gamma Subfamily A, 7 | unknown |  |
| Lnx1 | -6.885086225 | Ligand Of Numb-Protein X 1 | A member of the LNX (Ligand of Numb Protein-X) family of RING-type ubiquitin E3 ligases that mediates ubiquitination and subsequent proteasomal degradation of NUMB, a inhibitor of Notch signaling | ([54](#_ENREF_54)) |
| Gm20604 | -6.882643049 | predicted gene 20604 | unknown |  |
| Ar | -6.87036472 | Androgen Receptor | Androgen-mediated thyroid tumor growth | ([58](#_ENREF_58)) |
| Tph2 | -6.857980995 | Tryptophan Hydroxylase 2 | Catalyzes the first step in the biosynthesis of serotonin |  |
| Pax3 | -6.845490051 | Paired Box 3 | A tumor suppressor gene | ([59](#_ENREF_59)) |
| Pcdhga7 | -6.845490051 | Protocadherin Gamma Subfamily A, 7 | unknown |  |
| Cdh26 | -6.807354922 | Cadherin 26 | unknown |  |
| Serpina3i | -6.807354922 | serine (or cysteine) peptidase inhibitor, clade A, member 3I | Ortholog of human SERPINA3, which promotes tumor growth and metastasis | ([43](#_ENREF_43), [44](#_ENREF_44)) |
| Nes | -6.763084655 | Nestin | A member of the intermediate filament protein family. Promotes cell motility and invasiveness | ([60](#_ENREF_60)) |
| Fez1 | -6.695808269 | Fasciculation And Elongation Protein Zeta 1 | A tumor suppressor gene | ([61](#_ENREF_61)) |
| Serpina3h | -6.688833098 | serine (or cysteine) peptidase inhibitor, clade A, member 3H | unknown |  |
| Scnn1b | -6.672425342 | Sodium Channel Epithelial 1 Beta Subunit | A subunit of epithelial sodium channel to transfer sodium ions across the epithelial cell membrane |  |
| Cox6b2 | -6.626506272 | Cytochrome C Oxidase Subunit 6B2 | A subunit of Complex IV, the last enzyme in the mitochondrial electron transport chain |  |
| Abca1 | -6.584962501 | ATP Binding Cassette Subfamily A Member 1 | Functions as a cholesteral efflux pump in the cellular lipid removal pathway. It can potentiates metastatic behavior by increasing membrane fluidity | ([62](#_ENREF_62)) |
| Hoxd9 | -6.569855608 | Homeobox D9 | Promotes EMT and metastasis by upregulation of ZEB1 | ([63](#_ENREF_63)) |

Note: Vitamin D responsive genes are highlighted in green.

References

1. Wang, Z., Cao, C. J., Huang, L. L., Ke, Z. F., Luo, C. J., Lin, Z. W., Wang, F., Zhang, Y. Q., and Wang, L. T. EFEMP1 promotes the migration and invasion of osteosarcoma via MMP-2 with induction by AEG-1 via NF-kappaB signaling pathway. Oncotarget., *6:* 14191-14208., 2015.

2. Yin, X., Fang, S., Wang, M., Wang, Q., Fang, R., and Chen, J. EFEMP1 promotes ovarian cancer cell growth, invasion and metastasis via activated the AKT pathway. Oncotarget, *25:* 10296, 2016.

3. Kawamura, A., Koshida, S., Hijikata, H., Ohbayashi, A., Kondoh, H., and Takada, S. Groucho-associated transcriptional repressor ripply1 is required for proper transition from the presomitic mesoderm to somites. Dev Cell., *9:* 735-744., 2005.

4. Garibay-Cerdenares, O. L., Hernandez-Ramirez, V. I., Osorio-Trujillo, J. C., Gallardo-Rincon, D., and Talamas-Rohana, P. Haptoglobin and CCR2 receptor expression in ovarian cancer cells that were exposed to ascitic fluid: exploring a new role of haptoglobin in the tumoral microenvironment. Cell Adh Migr., *9:* 394-405. doi: 310.1080/19336918.19332015.11035504. Epub 19332015 Jul 19336925., 2015.

5. Draghiciu, O., Lubbers, J., Nijman, H. W., and Daemen, T. Myeloid derived suppressor cells-An overview of combat strategies to increase immunotherapy efficacy. Oncoimmunology., *4:* e954829. eCollection 952015 Jan., 2015.

6. Shaw, A. K., Pickup, M. W., Chytil, A., Aakre, M., Owens, P., Moses, H. L., and Novitskiy, S. V. TGFbeta signaling in myeloid cells regulates mammary carcinoma cell invasion through fibroblast interactions. PLoS One., *10:* e0117908. doi: 0117910.0111371/journal.pone.0117908. eCollection 0112015., 2015.

7. Soutto, M., Romero-Gallo, J., Krishna, U., Piazuelo, M. B., Washington, M. K., Belkhiri, A., Peek, R. M., Jr., and El-Rifai, W. Loss of TFF1 promotes Helicobacter pylori-induced beta-catenin activation and gastric tumorigenesis. Oncotarget., *6:* 17911-17922., 2015.

8. Liu, W., Li, H., Hong, S. H., Piszczek, G. P., Chen, W., and Rodgers, G. P. Olfactomedin 4 deletion induces colon adenocarcinoma in ApcMin/+ mice. Oncogene., *35:* 5237-5247. doi: 5210.1038/onc.2016.5258. Epub 2016 Mar 5214., 2016.

9. Gabrielson, M., Reizer, E., Stal, O., and Tina, E. Mitochondrial regulation of cell cycle progression through SLC25A43. Biochem Biophys Res Commun., *469:* 1090-1096. doi: 1010.1016/j.bbrc.2015.1012.1088. Epub 2015 Dec 1023., 2016.

10. Tina, E., Lindqvist, B. M., Gabrielson, M., Lubovac, Z., Wegman, P., and Wingren, S. The mitochondrial transporter SLC25A43 is frequently deleted and may influence cell proliferation in HER2-positive breast tumors. BMC Cancer., *12:350.:* 10.1186/1471-2407-1112-1350., 2012.

11. Revet, I., Huizenga, G., Chan, A., Koster, J., Volckmann, R., van Sluis, P., Ora, I., Versteeg, R., and Geerts, D. The MSX1 homeobox transcription factor is a downstream target of PHOX2B and activates the Delta-Notch pathway in neuroblastoma. Exp Cell Res., *314:* 707-719. doi: 710.1016/j.yexcr.2007.1012.1008. Epub 2008 Jan 1016., 2008.

12. Zhang, F., Kumano, M., Beraldi, E., Fazli, L., Du, C., Moore, S., Sorensen, P., Zoubeidi, A., and Gleave, M. E. Clusterin facilitates stress-induced lipidation of LC3 and autophagosome biogenesis to enhance cancer cell survival. Nat Commun., *5:5775.:* 10.1038/ncomms6775., 2014.

13. Yamanishi, Y., Kitaura, J., Izawa, K., Matsuoka, T., Oki, T., Lu, Y., Shibata, F., Yamazaki, S., Kumagai, H., Nakajima, H., Maeda-Yamamoto, M., Tybulewicz, V. L., Takai, T., and Kitamura, T. Analysis of mouse LMIR5/CLM-7 as an activating receptor: differential regulation of LMIR5/CLM-7 in mouse versus human cells. Blood., *111:* 688-698. Epub 2007 Oct 2010., 2008.

14. Amantini, C., Morelli, M. B., Nabissi, M., Cardinali, C., Santoni, M., Gismondi, A., and Santoni, G. Capsaicin triggers autophagic cell survival which drives epithelial mesenchymal transition and chemoresistance in bladder cancer cells in an Hedgehog-dependent manner. Oncotarget, *29:* 10326, 2016.

15. Hryniuk, A., Grainger, S., Savory, J. G., and Lohnes, D. Cdx1 and Cdx2 function as tumor suppressors. J Biol Chem., *289:* 33343-33354. doi: 33310.31074/jbc.M33114.583823. Epub 582014 Oct 583815., 2014.

16. Chiang, E. Y. and Stroynowski, I. A nonclassical MHC class I molecule restricts CTL-mediated rejection of a syngeneic melanoma tumor. J Immunol., *173:* 4394-4401., 2004.

17. Ma, B., Herzog, E. L., Lee, C. G., Peng, X., Lee, C. M., Chen, X., Rockwell, S., Koo, J. S., Kluger, H., Herbst, R. S., Sznol, M., and Elias, J. A. Role of chitinase 3-like-1 and semaphorin 7a in pulmonary melanoma metastasis. Cancer Res., *75:* 487-496. doi: 410.1158/0008-5472.CAN-1113-3339. Epub 2014 Dec 1115., 2015.

18. Fukushima, K., Takahashi, K., Fukushima, N., Honoki, K., and Tsujiuchi, T. Different effects of GPR120 and GPR40 on cellular functions stimulated by 12-O-tetradecanoylphorbol-13-acetate in melanoma cells. Biochem Biophys Res Commun., *475:* 25-30. doi: 10.1016/j.bbrc.2016.1005.1023. Epub 2016 May 1016., 2016.

19. Kim, S. M., Kwon, C. H., Shin, N., Park, D. Y., Moon, H. J., Kim, G. H., and Jeon, T. Y. Decreased Muc5AC expression is associated with poor prognosis in gastric cancer. Int J Cancer., *134:* 114-124. doi: 110.1002/ijc.28345. Epub 22013 Jul 28316., 2014.

20. Liu, Q., Jin, J., Ying, J., Cui, Y., Sun, M., Zhang, L., Fan, Y., Xu, B., and Zhang, Q. Epigenetic inactivation of the candidate tumor suppressor gene ASC/TMS1 in human renal cell carcinoma and its role as a potential therapeutic target. Oncotarget., *6:* 22706-22723., 2015.

21. Yang, H., Das, P., Yu, Y., Mao, W., Wang, Y., Baggerly, K., Wang, Y., Marquez, R. T., Bedi, A., Liu, J., Fishman, D., Lu, Z., and Bast, R. C., Jr. NDN is an imprinted tumor suppressor gene that is downregulated in ovarian cancers through genetic and epigenetic mechanisms. Oncotarget., *7:* 3018-3032. doi: 3010.18632/oncotarget.16576., 2016.

22. Hockendorf, U., Yabal, M., Herold, T., Munkhbaatar, E., Rott, S., Jilg, S., Kauschinger, J., Magnani, G., Reisinger, F., Heuser, M., Kreipe, H., Sotlar, K., Engleitner, T., Rad, R., Weichert, W., Peschel, C., Ruland, J., Heikenwalder, M., Spiekermann, K., Slotta-Huspenina, J., Gross, O., and Jost, P. J. RIPK3 Restricts Myeloid Leukemogenesis by Promoting Cell Death and Differentiation of Leukemia Initiating Cells. Cancer Cell., *30:* 75-91. doi: 10.1016/j.ccell.2016.1006.1002., 2016.

23. Baumhoer, D., Elsner, M., Smida, J., Zillmer, S., Rauser, S., Schoene, C., Balluff, B., Bielack, S., Jundt, G., Walch, A., and Nathrath, M. CRIP1 expression is correlated with a favorable outcome and less metastases in osteosarcoma patients. Oncotarget., *2:* 970-975., 2011.

24. Xia, L., Huang, W., Tian, D., Chen, Z., Zhang, L., Li, Y., Hu, H., Liu, J., Chen, Z., Tang, G., Dou, J., Sha, S., Xu, B., Liu, C., Ma, J., Zhang, S., Li, M., Fan, D., Nie, Y., and Wu, K. ACP5, a direct transcriptional target of FoxM1, promotes tumor metastasis and indicates poor prognosis in hepatocellular carcinoma. Oncogene., *33:* 1395-1406. doi: 1310.1038/onc.2013.1390. Epub 2013 Apr 1322., 2014.

25. Scott, K. L., Nogueira, C., Heffernan, T. P., van Doorn, R., Dhakal, S., Hanna, J. A., Min, C., Jaskelioff, M., Xiao, Y., Wu, C. J., Cameron, L. A., Perry, S. R., Zeid, R., Feinberg, T., Kim, M., Vande Woude, G., Granter, S. R., Bosenberg, M., Chu, G. C., DePinho, R. A., Rimm, D. L., and Chin, L. Proinvasion metastasis drivers in early-stage melanoma are oncogenes. Cancer Cell., *20:* 92-103. doi: 110.1016/j.ccr.2011.1005.1025., 2011.

26. Wang, J., Chen, L., Li, Y., and Guan, X. Y. Overexpression of cathepsin Z contributes to tumor metastasis by inducing epithelial-mesenchymal transition in hepatocellular carcinoma. PLoS One., *6:* e24967. doi: 24910.21371/journal.pone.0024967. Epub 0022011 Sep 0024922., 2011.

27. Beltran, A. S., Graves, L. M., and Blancafort, P. Novel role of Engrailed 1 as a prosurvival transcription factor in basal-like breast cancer and engineering of interference peptides block its oncogenic function. Oncogene., *33:* 4767-4777. doi: 4710.1038/onc.2013.4422. Epub 2013 Oct 4721., 2014.

28. Jin, H., Sperka, T., Herrlich, P., and Morrison, H. Tumorigenic transformation by CPI-17 through inhibition of a merlin phosphatase. Nature., *442:* 576-579., 2006.

29. Miller, G. J., Miller, H. L., van Bokhoven, A., Lambert, J. R., Werahera, P. N., Schirripa, O., Lucia, M. S., and Nordeen, S. K. Aberrant HOXC expression accompanies the malignant phenotype in human prostate. Cancer Res., *63:* 5879-5888., 2003.

30. Schmitz-Winnenthal, F. H., Weckauf, H., Haufe, S., Hinz, U., Z'Graggen, K., Klar, E., Buchler, M. W., and Weber, T. Detection and prognostic relevance of cytokeratin 20 in differentiated and anaplastic thyroid carcinomas by RT-PCR. Surgery., *134:* 964-971; discussion 971-962., 2003.

31. Ning, Y., Hanna, D. L., Zhang, W., Mendez, A., Yang, D., El-Khoueiry, R., Matsusaka, S., Sunakawa, Y., Stremitzer, S., Parekh, A., Okazaki, S., Berger, M. D., Barzi, A., and Lenz, H. J. Cytokeratin-20 and Survivin-Expressing Circulating Tumor Cells Predict Survival in Metastatic Colorectal Cancer Patients by a Combined Immunomagnetic qRT-PCR Approach. Mol Cancer Ther., *14:* 2401-2408. doi: 2410.1158/1535-7163.MCT-2415-0359. Epub 2015 Jul 2430., 2015.

32. Chen, L. and Flies, D. B. Molecular mechanisms of T cell co-stimulation and co-inhibition. Nat Rev Immunol., *13:* 227-242. doi: 210.1038/nri3405. Epub 2013 Mar 1038., 2013.

33. Yilmaz, M., Maass, D., Tiwari, N., Waldmeier, L., Schmidt, P., Lehembre, F., and Christofori, G. Transcription factor Dlx2 protects from TGFbeta-induced cell-cycle arrest and apoptosis. Embo J., *30:* 4489-4499. doi: 4410.1038/emboj.2011.4319., 2011.

34. Niehrs, C. Function and biological roles of the Dickkopf family of Wnt modulators. Oncogene., *25:* 7469-7481., 2006.

35. Bie, Q., Sun, C., Gong, A., Li, C., Su, Z., Zheng, D., Ji, X., Wu, Y., Guo, Q., Wang, S., and Xu, H. Non-tumor tissue derived interleukin-17B activates IL-17RB/AKT/beta-catenin pathway to enhance the stemness of gastric cancer. Sci Rep., *6:25447.:* 10.1038/srep25447., 2016.

36. Wong, S. Y., Haack, H., Kissil, J. L., Barry, M., Bronson, R. T., Shen, S. S., Whittaker, C. A., Crowley, D., and Hynes, R. O. Protein 4.1B suppresses prostate cancer progression and metastasis. Proc Natl Acad Sci U S A., *104:* 12784-12789. Epub 12007 Jul 12718., 2007.

37. Kim, Y. M., Brinkmann, M. M., Paquet, M. E., and Ploegh, H. L. UNC93B1 delivers nucleotide-sensing toll-like receptors to endolysosomes. Nature., *452:* 234-238. doi: 210.1038/nature06726. Epub 02008 Feb 06727., 2008.

38. Louie, S. M., Grossman, E. A., Crawford, L. A., Ding, L., Camarda, R., Huffman, T. R., Miyamoto, D. K., Goga, A., Weerapana, E., and Nomura, D. K. GSTP1 Is a Driver of Triple-Negative Breast Cancer Cell Metabolism and Pathogenicity. Cell Chem Biol., *23:* 567-578. doi: 510.1016/j.chembiol.2016.1003.1017. Epub 2016 May 1012., 2016.

39. Sandoval, J., Mendez-Gonzalez, J., Nadal, E., Chen, G., Carmona, F. J., Sayols, S., Moran, S., Heyn, H., Vizoso, M., Gomez, A., Sanchez-Cespedes, M., Assenov, Y., Muller, F., Bock, C., Taron, M., Mora, J., Muscarella, L. A., Liloglou, T., Davies, M., Pollan, M., Pajares, M. J., Torre, W., Montuenga, L. M., Brambilla, E., Field, J. K., Roz, L., Lo Iacono, M., Scagliotti, G. V., Rosell, R., Beer, D. G., and Esteller, M. A prognostic DNA methylation signature for stage I non-small-cell lung cancer. J Clin Oncol., *31:* 4140-4147. doi: 4110.1200/JCO.2012.4148.5516. Epub 2013 Sep 4130., 2013.

40. Liu, M., Shen, S., Chen, F., Yu, W., and Yu, L. Linking the septin expression with carcinogenesis. Mol Biol Rep., *37:* 3601-3608. doi: 3610.1007/s11033-11010-10009-11032. Epub 12010 Feb 11027., 2010.

41. Tian, L., Shen, D., Li, X., Shan, X., Wang, X., Yan, Q., and Liu, J. Ginsenoside Rg3 inhibits epithelial-mesenchymal transition (EMT) and invasion of lung cancer by down-regulating FUT4. Oncotarget., *7:* 1619-1632. doi: 1610.18632/oncotarget.16451., 2016.

42. Boufraqech, M., Wei, D., Weyemi, U., Zhang, L., Quezado, M., Kalab, P., and Kebebew, E. LOX is a novel mitotic spindle-associated protein essential for mitosis. Oncotarget., *7:* 29023-29035. doi: 29010.18632/oncotarget.28628., 2016.

43. Zhou, J., Cheng, Y., Tang, L., Martinka, M., and Kalia, S. Up-regulation of SERPINA3 correlates with high mortality of melanoma patients and increased migration and invasion of cancer cells. Oncotarget, *17*, 2016.

44. Yang, G. D., Yang, X. M., Lu, H., Ren, Y., Ma, M. Z., Zhu, L. Y., Wang, J. H., Song, W. W., Zhang, W. M., Zhang, R., and Zhang, Z. G. SERPINA3 promotes endometrial cancer cells growth by regulating G2/M cell cycle checkpoint and apoptosis. Int J Clin Exp Pathol., *7:* 1348-1358. eCollection 2014., 2014.

45. Giguere, P. M., Laroche, G., Oestreich, E. A., and Siderovski, D. P. G-protein signaling modulator-3 regulates heterotrimeric G-protein dynamics through dual association with Gbeta and Galphai protein subunits. J Biol Chem., *287:* 4863-4874. doi: 4810.1074/jbc.M4111.311712. Epub 312011 Dec 311713., 2012.

46. Maier, B., Kirsch, M., Anderhub, S., Zentgraf, H., and Kramer, A. The novel actin/focal adhesion-associated protein MISP is involved in mitotic spindle positioning in human cells. Cell Cycle., *12:* 1457-1471. doi: 1410.4161/cc.24602. Epub 22013 Apr 24610., 2013.

47. Yu, Y. S., Tang, Z. H., Pan, Q. C., Chen, X. H., Liu, X. N., and Zang, G. Q. Inhibition of Csn3 expression induces growth arrest and apoptosis of hepatocellular carcinoma cells. Cancer Chemother Pharmacol., *69:* 1173-1180. doi: 1110.1007/s00280-00011-01810-x. Epub 02012 Jan 00212., 2012.

48. Di Virgilio, F. P2RX7: A receptor with a split personality in inflammation and cancer. Mol Cell Oncol., *3:* e1010937. doi: 1010910.1011080/23723556.23722015.21010937. eCollection 23722016 Mar., 2015.

49. Laxman, S., Sutter, B. M., Shi, L., and Tu, B. P. Npr2 inhibits TORC1 to prevent inappropriate utilization of glutamine for biosynthesis of nitrogen-containing metabolites. Sci Signal., *7:* ra120. doi: 110.1126/scisignal.2005948., 2014.

50. Kim, T. H., Jo, S. H., Choi, H., Park, J. M., Kim, M. Y., Nojima, H., Kim, J. W., and Ahn, Y. H. Identification of Creb3l4 as an essential negative regulator of adipogenesis. Cell Death Dis., *5:e1527.:* 10.1038/cddis.2014.1490., 2014.

51. Wang, L., Rubinstein, R., Lines, J. L., Wasiuk, A., Ahonen, C., Guo, Y., Lu, L. F., Gondek, D., Wang, Y., Fava, R. A., Fiser, A., Almo, S., and Noelle, R. J. VISTA, a novel mouse Ig superfamily ligand that negatively regulates T cell responses. J Exp Med., *208:* 577-592. doi: 510.1084/jem.20100619. Epub 20102011 Mar 20100617., 2011.

52. Long, J. Z., Svensson, K. J., Bateman, L. A., Lin, H., Kamenecka, T., Lokurkar, I. A., Lou, J., Rao, R. R., Chang, M. R., Jedrychowski, M. P., Paulo, J. A., Gygi, S. P., Griffin, P. R., Nomura, D. K., and Spiegelman, B. M. The Secreted Enzyme PM20D1 Regulates Lipidated Amino Acid Uncouplers of Mitochondria. Cell., *166:* 424-435. doi: 410.1016/j.cell.2016.1005.1071. Epub 2016 Jun 1030., 2016.

53. Ocana, O. H., Corcoles, R., Fabra, A., Moreno-Bueno, G., Acloque, H., Vega, S., Barrallo-Gimeno, A., Cano, A., and Nieto, M. A. Metastatic colonization requires the repression of the epithelial-mesenchymal transition inducer Prrx1. Cancer Cell., *22:* 709-724. doi: 710.1016/j.ccr.2012.1010.1012. Epub 2012 Nov 1029., 2012.

54. Nie, J., McGill, M. A., Dermer, M., Dho, S. E., Wolting, C. D., and McGlade, C. J. LNX functions as a RING type E3 ubiquitin ligase that targets the cell fate determinant Numb for ubiquitin-dependent degradation. Embo J., *21:* 93-102., 2002.

55. Vignjevic, D., Schoumacher, M., Gavert, N., Janssen, K. P., Jih, G., Lae, M., Louvard, D., Ben-Ze'ev, A., and Robine, S. Fascin, a novel target of beta-catenin-TCF signaling, is expressed at the invasive front of human colon cancer. Cancer Res., *67:* 6844-6853., 2007.

56. Gugnoni, M., Sancisi, V., Gandolfi, G., Manzotti, G., Ragazzi, M., Giordano, D., Tamagnini, I., Tigano, M., Frasoldati, A., Piana, S., and Ciarrocchi, A. Cadherin-6 promotes EMT and cancer metastasis by restraining autophagy. Oncogene, *4:* 237, 2016.

57. Shiio, Y., Rose, D. W., Aur, R., Donohoe, S., Aebersold, R., and Eisenman, R. N. Identification and characterization of SAP25, a novel component of the mSin3 corepressor complex. Mol Cell Biol., *26:* 1386-1397., 2006.

58. Stanley, J. A., Aruldhas, M. M., Chandrasekaran, M., Neelamohan, R., Suthagar, E., Annapoorna, K., Sharmila, S., Jayakumar, J., Jayaraman, G., Srinivasan, N., and Banu, S. K. Androgen receptor expression in human thyroid cancer tissues: a potential mechanism underlying the gender bias in the incidence of thyroid cancers. J Steroid Biochem Mol Biol., *130:* 105-124. doi: 110.1016/j.jsbmb.2012.1002.1004. Epub 2012 Feb 1022., 2012.

59. Liu, W., Sui, F., Liu, J., Wang, M., Tian, S., Ji, M., Shi, B., and Hou, P. PAX3 is a novel tumor suppressor by regulating the activities of major signaling pathways and transcription factor FOXO3a in thyroid cancer. Oncotarget, *21:* 10753, 2016.

60. Bokhari, A. A., Baker, T. M., Dorjbal, B., Waheed, S., Zahn, C. M., Hamilton, C. A., Maxwell, G. L., and Syed, V. Nestin suppression attenuates invasive potential of endometrial cancer cells by downregulating TGF-beta signaling pathway. Oncotarget, *10:* 11947, 2016.

61. Vecchione, A., Baldassarre, G., Ishii, H., Nicoloso, M. S., Belletti, B., Petrocca, F., Zanesi, N., Fong, L. Y., Battista, S., Guarnieri, D., Baffa, R., Alder, H., Farber, J. L., Donovan, P. J., and Croce, C. M. Fez1/Lzts1 absence impairs Cdk1/Cdc25C interaction during mitosis and predisposes mice to cancer development. Cancer Cell., *11:* 275-289., 2007.

62. Zhao, W., Prijic, S., Urban, B. C., Tisza, M. J., Zuo, Y., Li, L., Tan, Z., Chen, X., Mani, S. A., and Chang, J. T. Candidate Antimetastasis Drugs Suppress the Metastatic Capacity of Breast Cancer Cells by Reducing Membrane Fluidity. Cancer Res., *76:* 2037-2049. doi: 2010.1158/0008-5472.CAN-2015-1970. Epub 2016 Jan 2029., 2016.

63. Lv, X., Li, L., Lv, L., Qu, X., Jin, S., Li, K., Deng, X., Cheng, L., He, H., and Dong, L. HOXD9 promotes epithelial-mesenchymal transition and cancer metastasis by ZEB1 regulation in hepatocellular carcinoma. J Exp Clin Cancer Res., *34:133.:* 10.1186/s13046-13015-10245-13043., 2015.
