# Supplementary material for: Cyp24a1 Attenuation Limits Progression of BrafV600E -Induced Papillary Thyroid Cancer Cells and Sensitizes Them to BRAFV600E Inhibitor PLX4720
Source: Oxford University Press journal article supplement (doi:10.1158/0008-5472.can-16-2066), 2017-02-27
Supplement: 00085472can162066-sup-169730_2_supp_3838127_jlbp8j.docx [file 00085472can162066-sup-169730_2_supp_3838127_jlbp8j.docx]

Supplementary Table 2. Differentially expressed vitamin D responsive genes in BVECyp24a1-wt and BVECyp24a1-null cells

| Gene Name | Log2 Ratio (BVECyp24a1-wt-1 with D3/ BVECyp24a1-wt-1) | Log2 Ratio (BVECyp24a1-null-1 with D3/ BVECyp24a1-null-1) | Log2 Ratio (BVECyp24a1-null-1/ BVECyp24a1-wt-1) | Gene description or role in cancer | Reference |
| --- | --- | --- | --- | --- | --- |
| 2210011C24Rik | -2.4584597 | -0.80385747 | -2.848774849 | RIKEN cDNA 2210011C24 gene. |  |
| Acot2 | 2.55721751 | 0.054447784 | 0.5711567011 | Acyl-CoA Thioesterase 2 involved in mitochondrial fatty acid oxidation in the liver |  |
| Adamts2 | 2.459431619 | 2.64385619 | -2.459431618 | DAM Metallopeptidase With Thrombospondin Type 1 Motif 2 |  |
| Adarb1 | 2.62188907 | 1.42786154 | 0.9004643264 | Adenosine Deaminase, RNA Specific B1. Can inhibit cell proliferation and migration |  |
| Adgrd1 | 4.611434712 | 4.47370575 | -0.491853096 | Adhesion G Protein-Coupled Receptor D1 |  |
| Aldh1l2 | -2.18982455 | 1.584962501 | -5.189824558 | A mitochondrial 10-formyltetrahydrofolate dehydrogenase in the folate pathway. Promote metastasis | ([1](#_ENREF_1)) |
| Baiap2l2 | 2.091922489 | 0 | -3.247927513 | BAI1 Associated Protein 2 Like 2. an epithelial-specific BAR domain protein that generates planar membrane structures |  |
| C1qtnf1 | 2.6485786 | 1.622195407 | -1.258311995 | C1q And Tumor Necrosis Factor Related Protein 1 |  |
| Cabp1 | 2.117422862 | -1 | -3.095924419 | Calcium Binding Protein 1, inhibits inositol trisphosphate receptors |  |
| Cacna2d4 | 5.044394119 | 4.029747343 | 2.5849625007 | Calcium Voltage-Gated Channel Auxiliary Subunit Alpha2delta 4 |  |
| Cdon | 2.096215315 | 3.452512205 | -0.610053481 | Cell Adhesion Associated, Oncogene Regulated |  |
| ChkbCpt1b | 6.686500527 | -1.93288580 | 6.3923174227 | predicted readthrough transcript that is candidate for nonsense-mediated mRNA decay. Function unknown |  |
| Col16a1 | 5.139551352 | 0 | 0 | induces expression of MMP9 and facilitates invasion of oral squamous cell carcinoma |  |
| Cpt1b | -6.10852445 | 5.584962501 | -6.108524456 | Carnitine Palmitoyltransferase 1, which is required for the net transport of long-chain fatty acyl-CoAs from the cytoplasm into the mitochondria |  |
| Ctsw | -2.87890818 | -1.58496250 | -0.318607736 | Cathepsin W |  |
| Cyp24a1 | 10.54761755 | 1.295775807 | 5.383704292 | Internal control for RNA-Sequencing |  |
| Dmpk | 2.435888738 | 0.901307685 | 1.9535150976 | Dystrophia Myotonica Protein Kinase |  |
| Efemp1 | 2.388342633 | -1 | -9.655083445 | promotes tumor cell migration and invasion | ([2](#_ENREF_2)) |
| Egr1 | -3.52714184 | -0.61835898 | -0.465365648 | a nuclear protein that functions as a transcriptional regulator and a tumor suppressor gene |  |
| Emilin2 | 4.415037499 | 0 | -1 | an extracellular matrix glycoprotein. It can trigger cell death through a direct binding to death receptors. It can also promote tumor angiogenesis. |  |
| Esr2 | 2.366782331 | -1.58496250 | 2.1950159824 | Estrogen Receptor 2 |  |
| Fat4 | 2.029146346 | 2.021061616 | -1.527247002 | FAT Atypical Cadherin 4 |  |
| Fndc1 | 4.266786541 | 1.807354922 | -1.584962500 | A receptor-independent accessory protein for the Gβγ subunit. It is involved in VEGF-mediated signal processing during angiogenesis |  |
| Gjb2 | 2.135436625 | 2.263034406 | -4.666756591 | Gap Junction Protein Beta 2 and its upregulation may play a role in local invasion of breast cancer | ([3](#_ENREF_3)) |
| Gm12505 | -2.18997094 | -0.74296433 | -3.353897204 | predicted gene 12505 |  |
| Gm12669 | -5.87344411 | -3.97459545 | -0.104432791 | predicted gene 12669 |  |
| Gm13278 | 3.901819606 | 1.412598454 | 1.9615258521 | predicted gene 13278 |  |
| Gm15772 | -2.75769703 | -1.33174715 | 0.0056027062 | predicted gene 15772 |  |
| Gm4070 | -4.95419631 | 3.025535092 | -2.146841388 | predicted gene 4070. Function unknown |  |
| Gm5801 | -3.15286983 | -0.51624975 | -0.910795050 | ubiquitin-conjugating enzyme E2, J2 homolog pseudogene |  |
| Gm7334 | 2.40151636 | 1 | 0.2006973502 | B-cell translocation gene 3 pseudogene |  |
| Greb1l | 2.032421478 | 1.392317423 | -0.459431618 | Growth Regulation By Estrogen In Breast Cancer-Like |  |
| Grin1os | 2.047753131 | 1.141427892 | 2.3602562135 | glutamate receptor, ionotropic, NMDA1 (zeta 1), opposite strand. Function unknown |  |
| Grk5 | 2.425606741 | 0.263034406 | 0.4568576749 | Promote migration and invasion of prostate cancer cells | ([4](#_ENREF_4)) |
| Haus1 | -2.88857871 | -1.25669287 | -0.271483595 | HAUS Augmin Like Complex Subunit 1 |  |
| Hist2h2aa2 | -9.11374216 | 8.169925001 | -9.113742166 | nucleosome assembly and DNA packaging |  |
| Hk1os | 2.850423644 | 0 | -0.584962500 | hexokinase 1, opposite strand |  |
| Htra3 | 2.42786154 | 2.080919995 | -0.691877704 | HtrA Serine Peptidase 3 |  |
| Kcnh1 | 3.906890596 | 2.080919995 | 3.1154772174 | Potassium Voltage-Gated Channel Subfamily H Member 1. Overexpression of the gene may confer a growth advantage to cancer cells and favor tumor cell proliferation | ([5](#_ENREF_5)) |
| Klhl33 | 7.238404739 | 2.807354922 | NA | Kelch Like Family Member 33. Function unknown |  |
| Krt16 | 6.988684687 | -0.19993757 | 6.409390936 | Keratin 16, which may be involved in tumor metastasis | ([6](#_ENREF_6)) |
| Krt17 | 5.832890014 | 6.942514505 | -3 | Keratin 17, which promote tumorigenesis | ([7](#_ENREF_7)) |
| Lbp | 2.192074279 | 1.652617741 | 4.0766803169 | Lipopolysaccharide Binding Protein, which is involved in the acute-phase immunologic response and promotes the release of cytokines in response to bacterial lipopolysaccharide |  |
| Lrtm2 | 7.087462841 | 5.610497593 | 2.8073549220 | Leucine-Rich Repeats And Transmembrane Domains 2, Function unknown |  |
| Matn2 | 2.756505781 | 1.40053793 | 0.5994620704 | Matrilin 2 |  |
| Mir5114 | 3.582099791 | -1.47502708 | 2.9569612764 | microRNA 5114 |  |
| Mir678 | 12.13378441 | 9.829722735 | NA | microRNA 678 |  |
| Mlph | 2.718087584 | 2.195015982 | 4.1890338243 | Melanophilin, a Rab effector protein involved in melanosome transport |  |
| Mmp13 | 3.247101937 | 5.777122721 | -2.569365645 | Matrix Metallopeptidase 13, which play a role in tumor invasion | ([8](#_ENREF_8)) |
| Mmp17 | 2.201633861 | 3.025535092 | -3.974004791 | Matrix Metallopeptidase 17, which promotes tumor growth and metastasis | ([9](#_ENREF_9)) |
| Mmp3 | 6.426264755 | 4.247927513 | 3.7004397181 | Matrix Metallopeptidase 3, which may play a role in tumor cell migration and invasion | ([10](#_ENREF_10)) |
| Mturn | 2.215012891 | 1.047305715 | -0.900464326 | Maturin, Neural Progenitor Differentiation Regulator Homolog (Xenopus) |  |
| Nedd9 | 2.237767647 | 2.06008305 | 0.1080597458 | Neural Precursor Cell Expressed, Developmentally Down-Regulated 9 |  |
| Notum | 2.01402047 | 1.938599455 | -4.415037499 | A key negative regulator of the Wnt signaling pathway and overexpressed in colorectal cancer | ([11](#_ENREF_11)) |
| Parm1 | 2.858723313 | 1.558628353 | 0.9451380649 | Prostate Androgen-Regulated Mucin-Like Protein 1 |  |
| Pdlim2 | 2.005171206 | 0.665089412 | 2.3860097312 | A member of the actinin-associated LIM family of proteins. A putative ubiquitin-E3 ligase and tumor suppressor gene. It is able to inhibit tumorigenicity and induces tumor cell death. | ([12](#_ENREF_12), [13](#_ENREF_13)) |
| Pdzk1ip1 | 2.0890433 | 0.30718151 | -1.448273828 | It promotes cancer progression and is overexpressed in thyroid carcinomas and target of Twist1 transcription factor | ([14](#_ENREF_14), [15](#_ENREF_15)) |
| Pigr | 2.047305715 | 1.403554061 | 5.5637682784 | Polymeric Immunoglobulin Receptor. A prognostic biomarker: reduced expression is associated with poor prognosis | ([16](#_ENREF_16)) |
| Ppp1r2-ps3 | -7.94836723 | 5.930737338 | -7.948367231 | protein phosphatase 1, regulatory (inhibitor) subunit 2, pseudogene 3. Function unknown |  |
| Prelp | 2.869843609 | 2.807354922 | -1.979822118 | Proline/Arginine-Rich End Leucine-Rich Repeat Protein |  |
| Prex2 | -3.78905410 | -1.87762600 | 0.3761484858 | Phosphatidylinositol-3,4,5-Trisphosphate Dependent Rac Exchange Factor 2 |  |
| Rassf2 | 2.359895945 | 0.847996907 | -1.584962500 | a tumor suppressor gene, which acts as a KRAS-specific effector protein and promote apoptosis and cell cycle arrest |  |
| Relt | 2.301090632 | 0.842273338 | 0.7607230852 | RELT Tumor Necrosis Factor Receptor |  |
| Rgl1 | 2.215267987 | 1.777607579 | -2.050626073 | Ral Guanine Nucleotide Dissociation Stimulator Like 1 |  |
| Sarnp | -2.86090439 | -3.26946067 | 1.1284483654 | SAP Domain Containing Ribonucleoprotein |  |
| Shisa6 | 4.672425342 | 3.273018494 | 0.5849625007 | Shisa Family Member 6 |  |
| Slc30a2 | 6.375039431 | 2.807354922 | NA | a zinc transporter |  |
| Sprr2e | 9.328674927 | 4.988086678 | 4.2479275134 | Small proline rich protein 2E, Function unknown |  |
| Sprr2h | 3.658211483 | 4.235216462 | 0.5849625007 | Small proline-rich protein 2H |  |
| Srcin1 | 2.20511443 | 1.091147888 | -1.646363045 | SRC Kinase Signaling Inhibitor 1, a putative tumor suppressor gene | ([17](#_ENREF_17)) |
| Srp54a | 2.125530882 | 2.029747343 | -0.874469117 | Signal recognition particle 54A |  |
| Tesc | 2.549406131 | 0.699714199 | 1.7816544117 | It promotes tumor progression | ([18](#_ENREF_18)) |
| Tgfbr3 | 2.200139614 | 2.936637939 | -0.807354922 | Transforming Growth Factor Beta Receptor 3 |  |
| Tmem254b | -11.3111806 | -0.05102566 | 0.4545198275 | transmembrane protein 254b. Function unknown |  |
| Tmem254c | 2.256603081 | 1.542968412 | -0.384412224 | transmembrane protein 254c. Function unknown |  |
| Tmsb15l | -8.27146302 | -7.05528243 | -1.216180592 | thymosin beta 15b like |  |
| Tnnt2 | -2.02742715 | -1.54755994 | 1.8928436390 | troponin T2, cardiac type |  |
| Ttc22 | 5.930737338 | 4.744161096 | 2.3219280948 | tetratricopeptide repeat domain 22. Function unknown |  |
| Vnn1 | 2.046619326 | 2.780801503 | -1.403480467 | Vanin 1 |  |
| Wdr72 | 5.754887502 | 4.189824559 | 2 | WD Repeat Domain 72. Function unknown |  |

Based on log2 ratio>2 of BVECyp24a1-null /BVECyp24a1-wt, up-regulated genes are highlighted in red and down-regulated genes are in green.

References

1. Piskounova, E., Agathocleous, M., Murphy, M. M., Hu, Z., Huddlestun, S. E., Zhao, Z., Leitch, A. M., Johnson, T. M., DeBerardinis, R. J., and Morrison, S. J. Oxidative stress inhibits distant metastasis by human melanoma cells. Nature., *527:* 186-191. doi: 110.1038/nature15726. Epub 12015 Oct 15714., 2015.

2. Yin, X., Fang, S., Wang, M., Wang, Q., Fang, R., and Chen, J. EFEMP1 promotes ovarian cancer cell growth, invasion and metastasis via activated the AKT pathway. Oncotarget, *25:* 10296, 2016.

3. Castellana, B., Escuin, D., Peiro, G., Garcia-Valdecasas, B., Vazquez, T., Pons, C., Perez-Olabarria, M., Barnadas, A., and Lerma, E. ASPN and GJB2 Are Implicated in the Mechanisms of Invasion of Ductal Breast Carcinomas. J Cancer., *3:175-83.:* 10.7150/jca.4120. Epub 2012 Apr 7116., 2012.

4. Chakraborty, P. K., Zhang, Y., Coomes, A. S., Kim, W. J., Stupay, R., Lynch, L. D., Atkinson, T., Kim, J. I., Nie, Z., and Daaka, Y. G protein-coupled receptor kinase GRK5 phosphorylates moesin and regulates metastasis in prostate cancer. Cancer Res., *74:* 3489-3500. doi: 3410.1158/0008-5472.CAN-3413-2708. Epub 2014 Apr 3422., 2014.

5. Pardo, L. A. and Stuhmer, W. The roles of K(+) channels in cancer. Nat Rev Cancer., *14:* 39-48. doi: 10.1038/nrc3635. Epub 2013 Dec 1012., 2014.

6. Joosse, S. A., Hannemann, J., Spotter, J., Bauche, A., Andreas, A., Muller, V., and Pantel, K. Changes in keratin expression during metastatic progression of breast cancer: impact on the detection of circulating tumor cells. Clin Cancer Res., *18:* 993-1003. doi: 1010.1158/1078-0432.CCR-1011-2100. Epub 2012 Jan 1006., 2012.

7. Hobbs, R. P., Batazzi, A. S., Han, M. C., and Coulombe, P. A. Loss of Keratin 17 induces tissue-specific cytokine polarization and cellular differentiation in HPV16-driven cervical tumorigenesis in vivo. Oncogene., *35:* 5653-5662. doi: 5610.1038/onc.2016.5102. Epub 2016 Apr 5611., 2016.

8. Shi, X., Chen, Z., Hu, X., Luo, M., Sun, Z., Li, J., Shi, S., Feng, X., Zhou, C., Li, Z., Yang, W., Li, Y., Wang, P., Zhou, F., Gao, Y., and He, J. AJUBA promotes the migration and invasion of esophageal squamous cell carcinoma cells through upregulation of MMP10 and MMP13 expression. Oncotarget., *7:* 36407-36418. doi: 36410.18632/oncotarget.39239., 2016.

9. Paye, A., Truong, A., Yip, C., Cimino, J., Blacher, S., Munaut, C., Cataldo, D., Foidart, J. M., Maquoi, E., Collignon, J., Delvenne, P., Jerusalem, G., Noel, A., and Sounni, N. E. EGFR activation and signaling in cancer cells are enhanced by the membrane-bound metalloprotease MT4-MMP. Cancer Res., *74:* 6758-6770. doi: 6710.1158/0008-5472.CAN-6713-2994. Epub 2014 Oct 6715., 2014.

10. Shoshan, E., Braeuer, R. R., Kamiya, T., Mobley, A. K., Huang, L., Vasquez, M. E., Velazquez-Torres, G., Chakravarti, N., Ivan, C., Prieto, V., Villares, G. J., and Bar-Eli, M. NFAT1 Directly Regulates IL8 and MMP3 to Promote Melanoma Tumor Growth and Metastasis. Cancer Res., *76:* 3145-3155. doi: 3110.1158/0008-5472.CAN-3115-2511. Epub 2016 Mar 3124., 2016.

11. De Robertis, M., Arigoni, M., Loiacono, L., Riccardo, F., Calogero, R. A., Feodorova, Y., Tashkova, D., Belovejdov, V., Sarafian, V., Cavallo, F., and Signori, E. Novel insights into Notum and glypicans regulation in colorectal cancer. Oncotarget., *6:* 41237-41257. doi: 41210.18632/oncotarget.45652., 2015.

12. Vanoirbeek, E., Eelen, G., Verlinden, L., Carmeliet, G., Mathieu, C., Bouillon, R., O'Connor, R., Xiao, G., and Verstuyf, A. PDLIM2 expression is driven by vitamin D and is involved in the pro-adhesion, and anti-migration and -invasion activity of vitamin D. Oncogene., *33:* 1904-1911. doi: 1910.1038/onc.2013.1123. Epub 2013 Apr 1915., 2014.

13. Wurster, K. D., Hummel, F., Richter, J., Giefing, M., Hartmann, S., Hansmann, M. L., Kreher, S., Kochert, K., Krappmann, D., Klapper, W., Hummel, M., Wenzel, S. S., Lenz, G., Janz, M., Dorken, B., Siebert, R., and Mathas, S. Inactivation of the putative ubiquitin-E3 ligase PDLIM2 in classical Hodgkin and anaplastic large cell lymphoma. Leukemia, *14:* 238, 2016.

14. Di Maro, G., Orlandella, F. M., Bencivenga, T. C., Salerno, P., Ugolini, C., Basolo, F., Maestro, R., and Salvatore, G. Identification of targets of Twist1 transcription factor in thyroid cancer cells. J Clin Endocrinol Metab., *99:* E1617-1626. doi: 1610.1210/jc.2013-3799. Epub 2014 May 1621., 2014.

15. Guijarro, M. V., Vergel, M., Marin, J. J., Munoz-Galvan, S., Ferrer, I., Ramon y Cajal, S., Roncador, G., Blanco-Aparicio, C., and Carnero, A. p38alpha limits the contribution of MAP17 to cancer progression in breast tumors. Oncogene., *31:* 4447-4459. doi: 4410.1038/onc.2011.4619. Epub 2012 Jan 4423., 2012.

16. Fristedt, R., Gaber, A., Hedner, C., Nodin, B., Uhlen, M., Eberhard, J., and Jirstrom, K. Expression and prognostic significance of the polymeric immunoglobulin receptor in esophageal and gastric adenocarcinoma. J Transl Med., *12:83.:* 10.1186/1479-5876-1112-1183., 2014.

17. Wang, P., Wang, H., Li, X., Liu, Y., Zhao, C., and Zhu, D. SRCIN1 Suppressed Osteosarcoma Cell Proliferation and Invasion. PLoS One., *11:* e0155518. doi: 0155510.0151371/journal.pone.0155518. eCollection 0152016., 2016.

18. Kang, Y. H., Han, S. R., Kim, J. T., Lee, S. J., Yeom, Y. I., Min, J. K., Lee, C. H., Kim, J. W., Yoon, S. R., Yoon, D. Y., Hong, K. S., Hwang, G. S., Kim, H. C., Lee, Y. H., and Lee, H. G. The EF-hand calcium-binding protein tescalcin is a potential oncotarget in colorectal cancer. Oncotarget., *5:* 2149-2160., 2014.
