# Supplementary material for: Cyp24a1 Attenuation Limits Progression of BrafV600E -Induced Papillary Thyroid Cancer Cells and Sensitizes Them to BRAFV600E Inhibitor PLX4720
Source: Oxford University Press journal article supplement (doi:10.1158/0008-5472.can-16-2066), 2017-02-27
Supplement: 00085472can162066-sup-169730_2_supp_3838129_1lbp81.docx [file 00085472can162066-sup-169730_2_supp_3838129_1lbp81.docx]

Supplementary Table 1. Primer sequences for qPCR

| Primer name | Forward primer | Reverse primer |
| --- | --- | --- |
| Pycard | 5’-ACTAAAGAAGAGTCTGGAGC-3’  in exon 1 and 2 | 5’-GAGGAGGGAGTCCTTGCAGG-3’  in exon 3 |
| Msx1 | 5’-CTCTCGGCCATTTCTCAGTC-3’  in exon 1 | 5’-TACTGCTTCTGGCGGAACTT-3’  in exon 2 |
| Olfm4 | 5’-GGACCTGCCAGTGTTCTGTT-3’  in exon 2 | 5’-GACCTCTACTCGGACCGTCA-3’  in exon 3 |
| Slc25a43 | 5’-GATTGATGGTGCAGAACGTG-3’  in exon 2 | 5’-GGGGTCCATTCCAGACTTTT-3’  in exon 3 |
| Hoxc5 | 5’-GCAGTGGGGAGATCAAAGAG-3’ in exon 1 | 5’-TGAGGTAGCGGTTAAAATGGA-3’  in exon 2 |
| Acp5 | 5’-CGTCTCTGCACAGATTGCAT-3’  in exon 3 | 5’-AACTGCTTTTTGAGCCAGGA-3’  in exon 4 |
| En1 | 5’-ACACAACCCTGCGATCCTAC-3’  in exon 1 | 5’-GATATAGCGGTTTGCCTGGA-3’  in exon 2 |
| Fut4 | 5’-GAGGGAGCAGTGACGCTAAC-3’  in exon 1 | 5’-GTTGGATCGCTCCTGGAATA-3’  in exon 1 |
| P2rx7 | 5’-TGTGTGCATTGACTTGCTCA-3’  in exon 11 | 5’-CTTGCAGACTTTTCCCAAGC-3’  in exon 12 |
| Fscn1 | 5’-CCGCAGGTTAACATCTACAGC-3  in exon 1 | 5’-GCGAAAGGCACACTTTCTTG-3’  in exon 2 |
| Prrx1 | 5’-CACCTGCTAGACCTGGAGGA-3’  in exon 1 | 5’-TCCGCTGCTTTCTCTTCTTC-3’  in exon 2 |
| Ctsz | 5’-AATGCTGGCTCTTGTGAAGG-3’  in exon 3 | 5’-GCATAGATCTCGGCCATCAT-3’  in exon 4 |
| Efemp1 | 5’-GAAGTTCAAACTGGCCGAAA-3  in exon 4 | 5’-TCACCTCGCTTCTGATACCC-3’  in exon 5 |
